# Supplementary material for: Expanding the range of the respiratory infectome in Australian feedlot cattle with and without respiratory disease using metatranscriptomics
Source: PubMed Central journal article supplement (PMC10367309; doi:10.1186/s40168-023-01591-1), 2023-07-25
Supplement: 40168_2023_1591_MOESM2_ESM.pdf [file 40168_2023_1591_MOESM2_ESM.pdf]

*Additional File 1:*

Table: Primers and probes used to determine viral abundance through qRT-PCR and qPCR.

| Target virus                                                        | Primer/Probe sequence 5'-3'                                                                                                                                                |
|---------------------------------------------------------------------|----------------------------------------------------------------------------------------------------------------------------------------------------------------------------|
| Bovine Nidovirus                                                    | F TCGCCCACGCTTAACGA<br>R GGCATTGAGCAGCGAYTCA<br>Pr CCAAATTTAAGGCGATGCTTGCTTCCG FAM-BHQ1                                                                                    |
| Bovine narmovirus-1 (Bulang virus)                                  | F GGATTGTTACCAAGAGGATCATGAT<br>R TATCCAGCATCCCTGCTATGC<br>Pr CCATAATAATACCTCGCGCTGCACATGAGA Quasar 670<br>BHQ2                                                             |
| Influenza D virus                                                   | F CCCCRATAGGATCAATGTTCGAT<br>R TTCTCCCCCTATGATTCCATTYTC<br>Pr CAATTGAAGCCAAAATYCTTGACCGGG TAMARA BHQ2                                                                      |
| Bovine Coronavirus                                                  | F GCGTCCAAAGGCTATATTGCTAA<br>R CCCAACATTTGGATTCTGACATAA<br>Pr TGCCTTTCAACAGGTATT FAM-MGB                                                                                   |
| Bovine Rhinitis A<br>(adapted from Kishimoto et al.,<br>2017) [1]   | F CGGTGTAGCGACGACAACA<br>R TGGGCATCCTTAGTCTCCCA<br>Pr GGCCTTGGGACRCCCTCTCCA Quasar670/BHQ2                                                                                 |
| Bovine Rhinitis B<br>(adapted from Kishmitot M et al.,<br>2017) [1] | F GAACGCGATTGTGTYTAGGG<br>R CGCMACTGAGGTTAGCTTCTCC<br>Pr CTGTCCTTTGCACGGCGTGGC Fam/BHQ1                                                                                    |
| Bovine Viral Diarrhea<br>From [2]                                   | BVD190-F GRA GTC GTC ART GGT TCG AC<br>F un_labelled_Primer<br>R V326 TCA ACT CCA TGT GCC ATG TAC un_labelled_Primer<br>Pr TQ-pesti TGC YAY GTG GAC GAG GGC ATG C Fam-BHQ1 |
| Bovine alphaherpesvirus-1.<br>From [3]                              | F gB-F TGT GGA CCT AAA CCT CAC GGT un_labelled_Primer<br>R gB-R A GTC GAG CAG ACC CGT GTC un_labelled_Primer<br>Pr BoHV1-P AGG ACC GCG AGT TCT TGC CGC FAM-BHQ1            |

Cycling parameters Reverse transcription step involving one cycle at 45°C for 10 min.

The PCR cycling conditions included an RT inactivation/initial denaturation of 95°C for 10 min followed by amplification with 45 cycles of 95°C for 15 sec and 60°C for 45 sec.

## References:

1. Kishimoto M, Tsuchiaka S, Rahpaya SS, Hasebe A, Otsu K, Sugimura S, Kobayashi S, Komatsu N, Nagai M, Omatsu T *et al*: **Development of a one-run real-time PCR detection system for pathogens associated with bovine respiratory disease complex.** *J Vet Med Sci* 2017, **79**(3):517-523.
2. Hoffmann B, Depner K, Schirrmeier H, Beer M: **A universal heterologous internal control system for duplex real-time RT-PCR assays used in a detection system for pestiviruses.** *J Virol Methods* 2006, **136**(1-2):200-209.
3. Wang J, O'Keefe J, Orr D, Loth L, Banks M, Wakeley P, West D, Card R, Ibata G, Van Maanen K *et al*: **Validation of a real-time PCR assay for the detection of bovine herpesvirus 1 in bovine semen.** *J Virol Methods* 2007, **144**(1-2):103-108.
