# Supplementary material for: Expanding the range of the respiratory infectome in Australian feedlot cattle with and without respiratory disease using metatranscriptomics
Source: PubMed Central journal article supplement (PMC10367309; doi:10.1186/s40168-023-01591-1), 2023-07-25
Supplement: 40168_2023_1591_MOESM3_ESM.pdf [file 40168_2023_1591_MOESM3_ESM.pdf]

*Additional file 3.*

**Table.** Contigs taxonomically classified as Bovine and Porcine Rotavirus and their amino acid identity to published reference.

| Rotavirus segment         | Amino acid identity to closest reference | Reference accession number | Reference length | Contig length |
|---------------------------|------------------------------------------|----------------------------|------------------|---------------|
| Rotavirus VP7 (porcine B) | 70.78%                                   | BAI48757.1                 | 242              | 465           |
| Rotavirus VP1 (bovine C)  | 100                                      | BAO73924.1                 | 1090             | 317           |
| Rotavirus NSP4 (bovine B) | 82.22                                    | BAW98444.1                 | 208              | 271           |
