# Supplementary material for: Expanding the range of the respiratory infectome in Australian feedlot cattle with and without respiratory disease using metatranscriptomics
Source: PubMed Central journal article supplement (PMC10367309; doi:10.1186/s40168-023-01591-1), 2023-07-25
Supplement: 40168_2023_1591_MOESM4_ESM.pdf [file 40168_2023_1591_MOESM4_ESM.pdf]

*Additional file 4:* Phylogenetic trees depicting bootstrap values

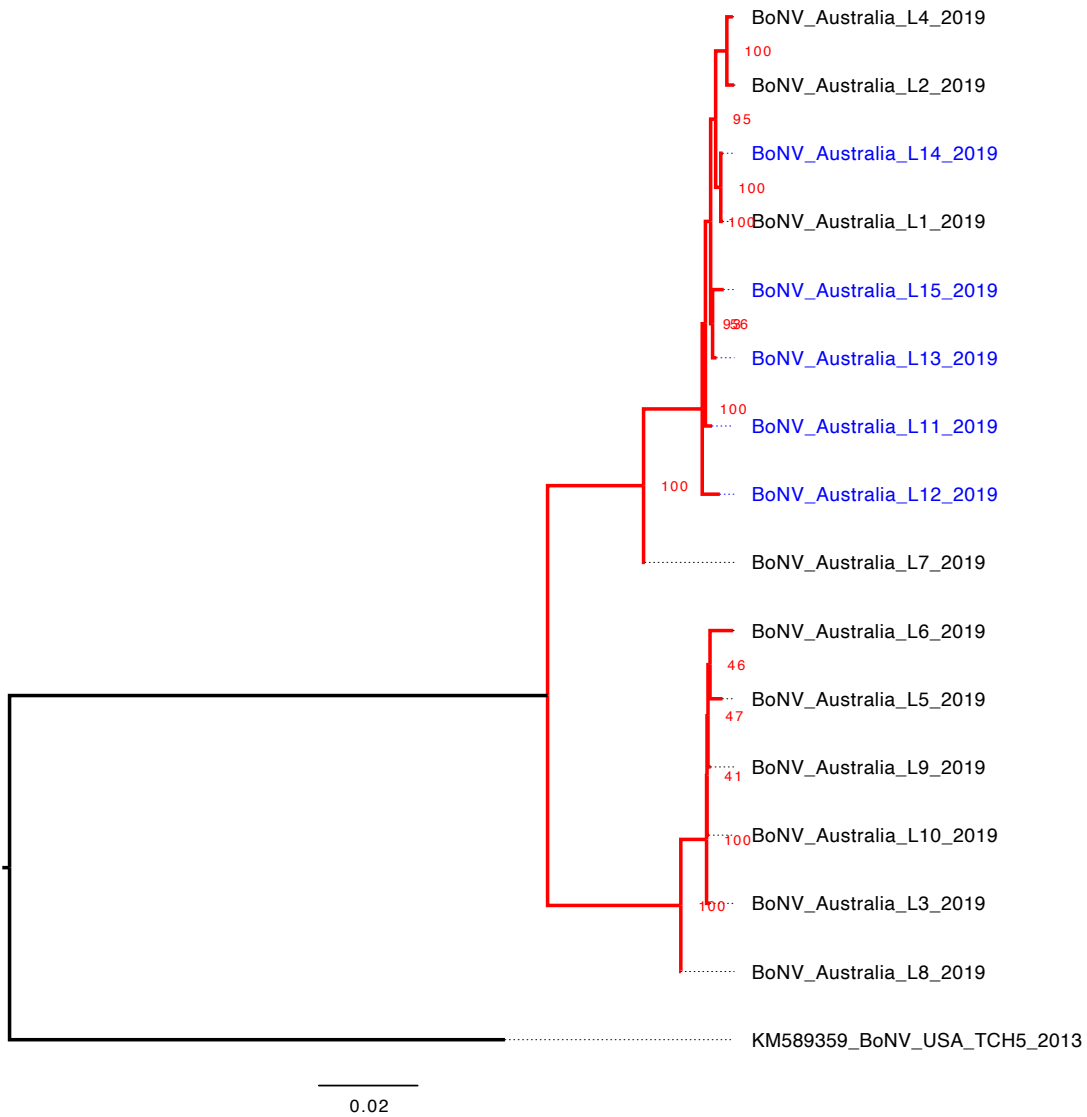

Fig. Maximum likelihood phylogenetic tree of bovine nidovirus (using whole genome).
