# Supplementary material for: Expanding the range of the respiratory infectome in Australian feedlot cattle with and without respiratory disease using metatranscriptomics
Source: PubMed Central journal article supplement (PMC10367309; doi:10.1186/s40168-023-01591-1), 2023-07-25
Supplement: 40168_2023_1591_MOESM6_ESM.pdf [file 40168_2023_1591_MOESM6_ESM.pdf]

**Additional file 6- Phylogenies with bootstrap values of BRAV, BRBV, EV-E capsid (VP2, VP3 and VP1) and 3D polymerase.**

**6.1 Bovine rhinitis A virus – capsid (VP2,VP3 & VP1)**

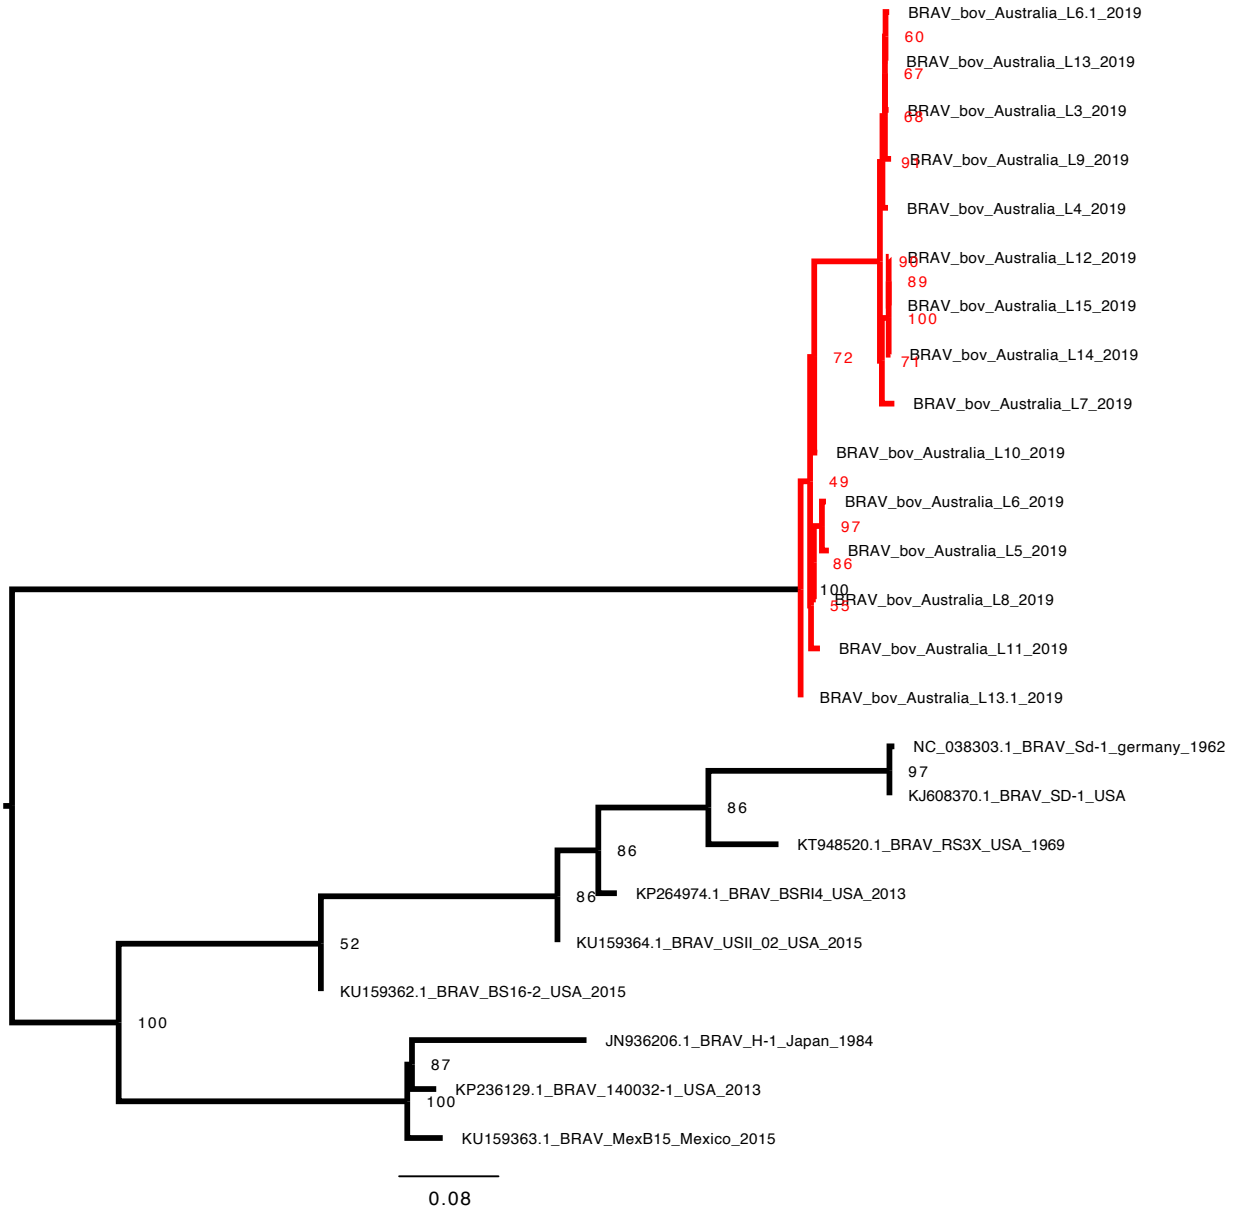

## 6.2. Bovine rhinitis A virus– 3D polymerase

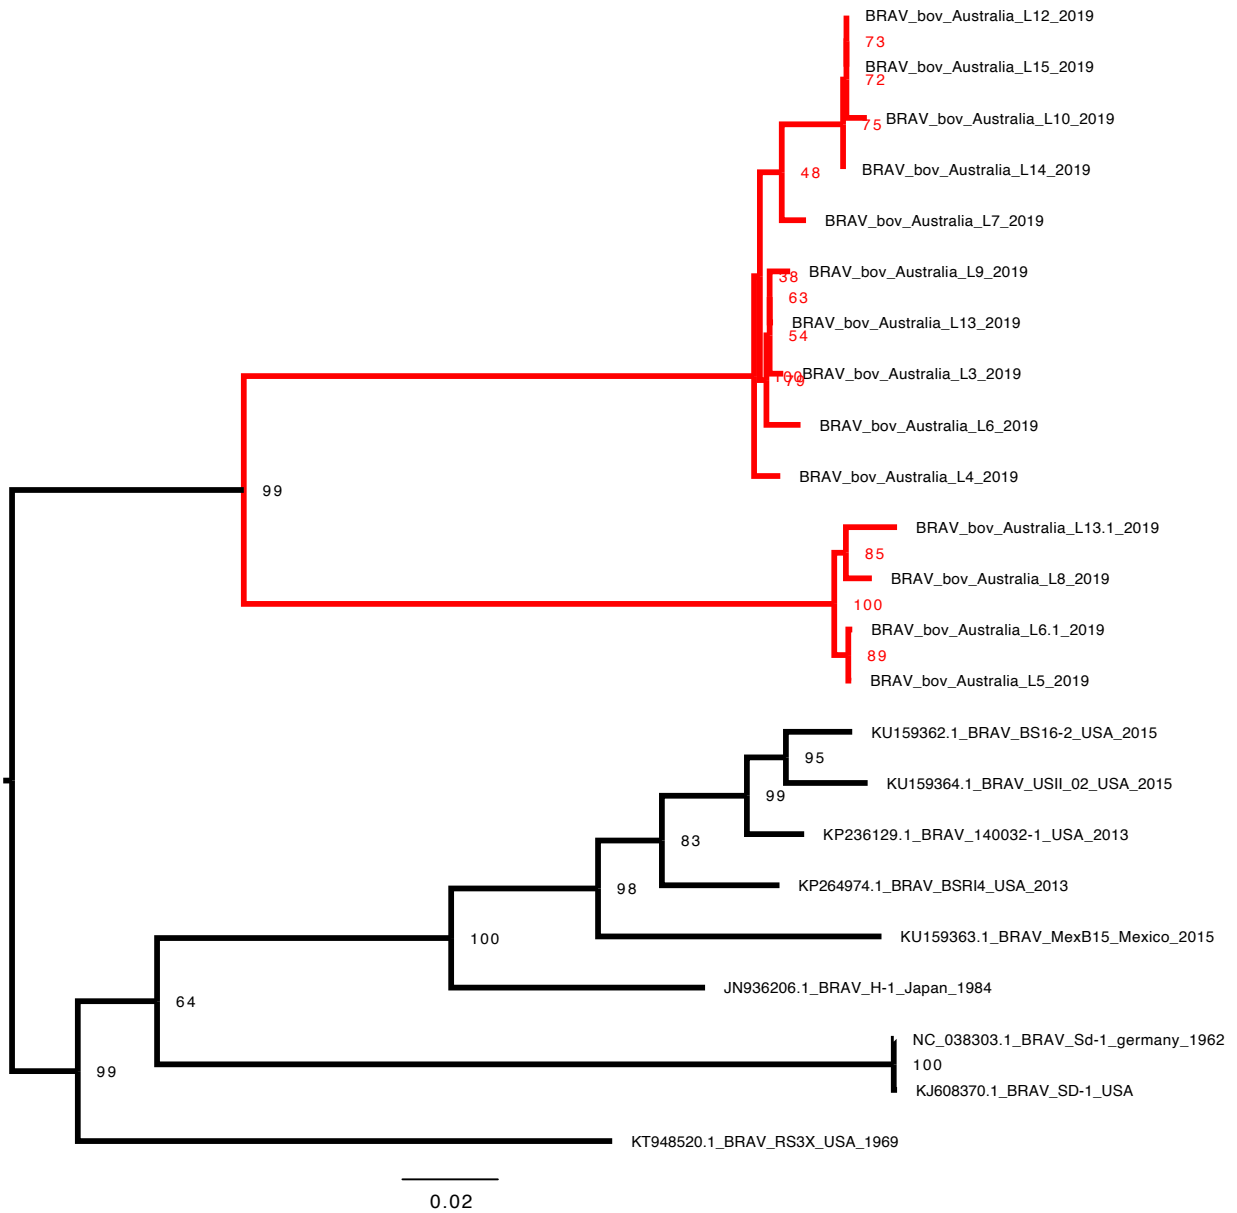

### 6.3 Bovine rhinitis B virus – capsid (VP2,VP3 & VP1)

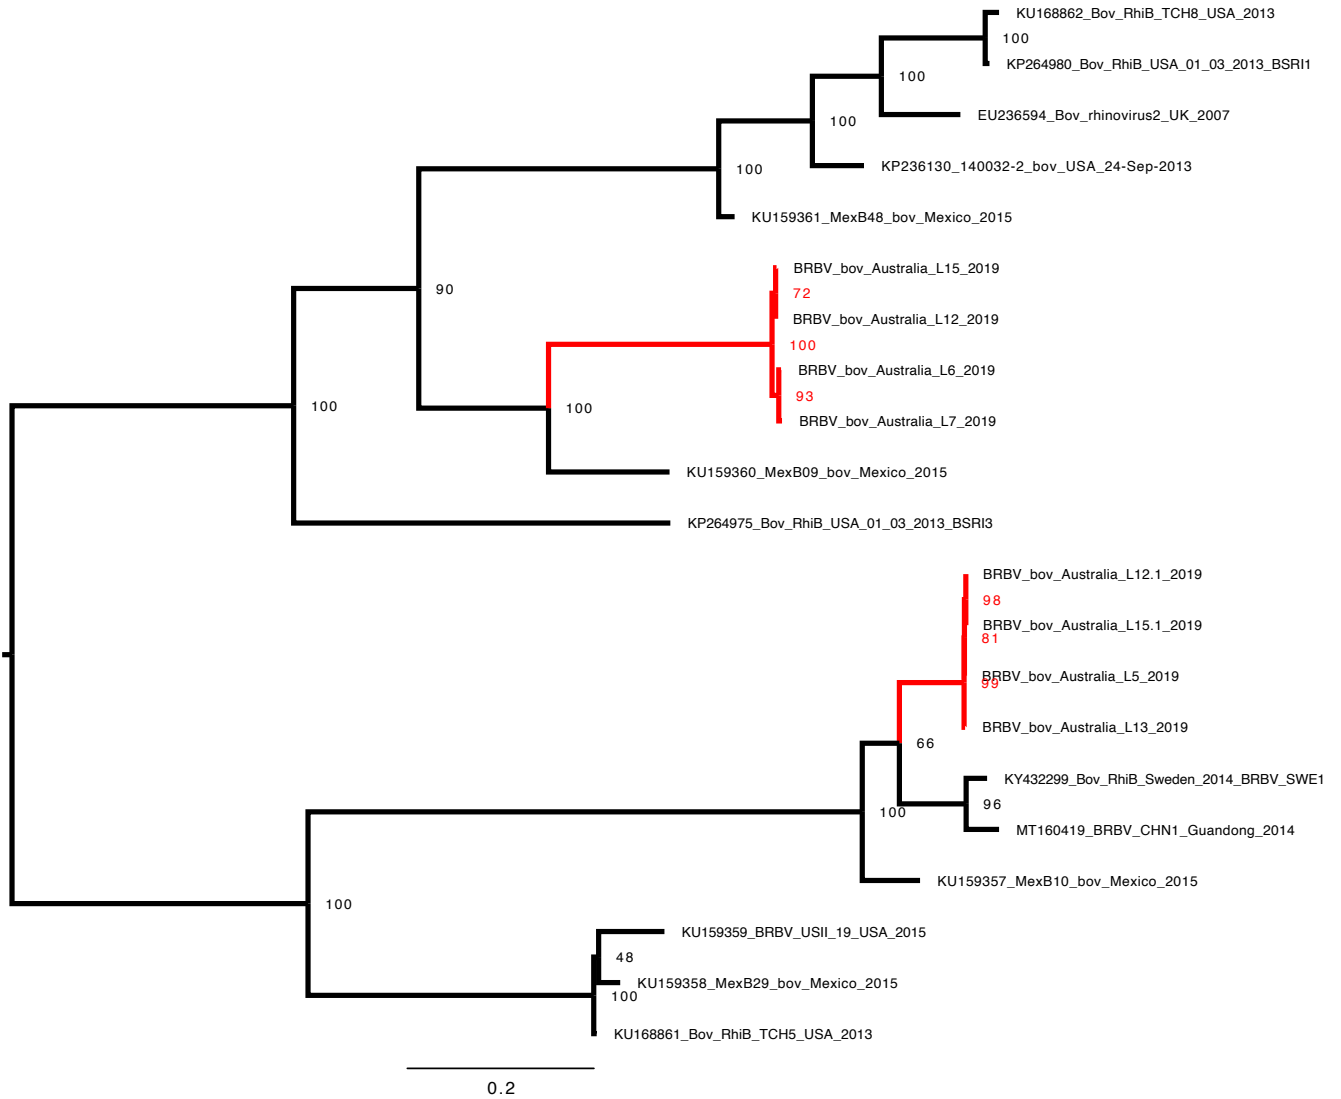

## 6.4 Bovine rhinitis B virus– 3D polymerase

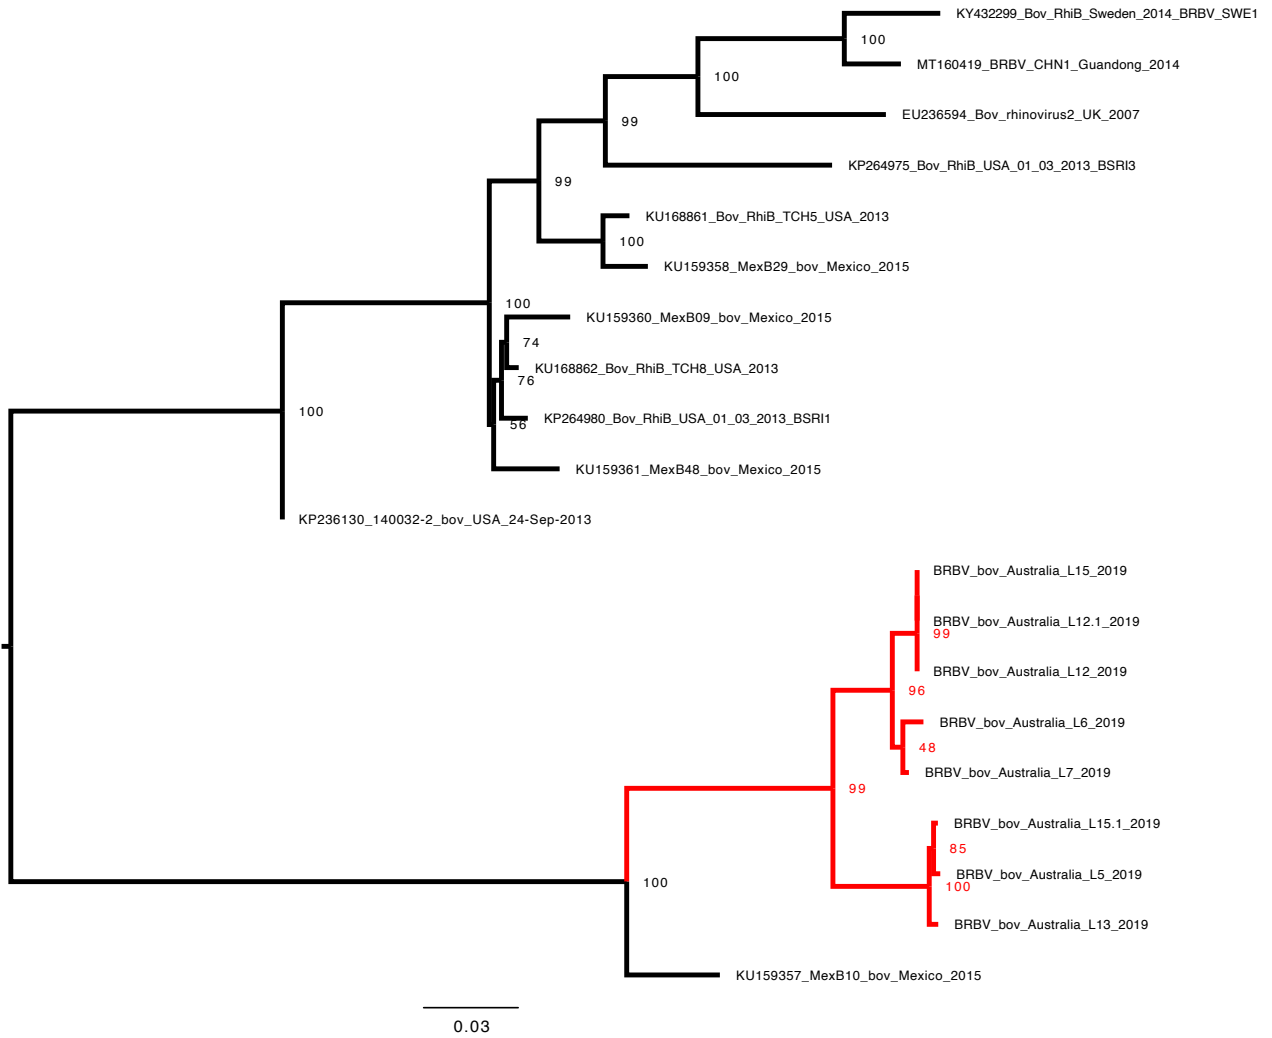

## 6.5 Enterovirus E– capsid (VP2,VP3 & VP1)

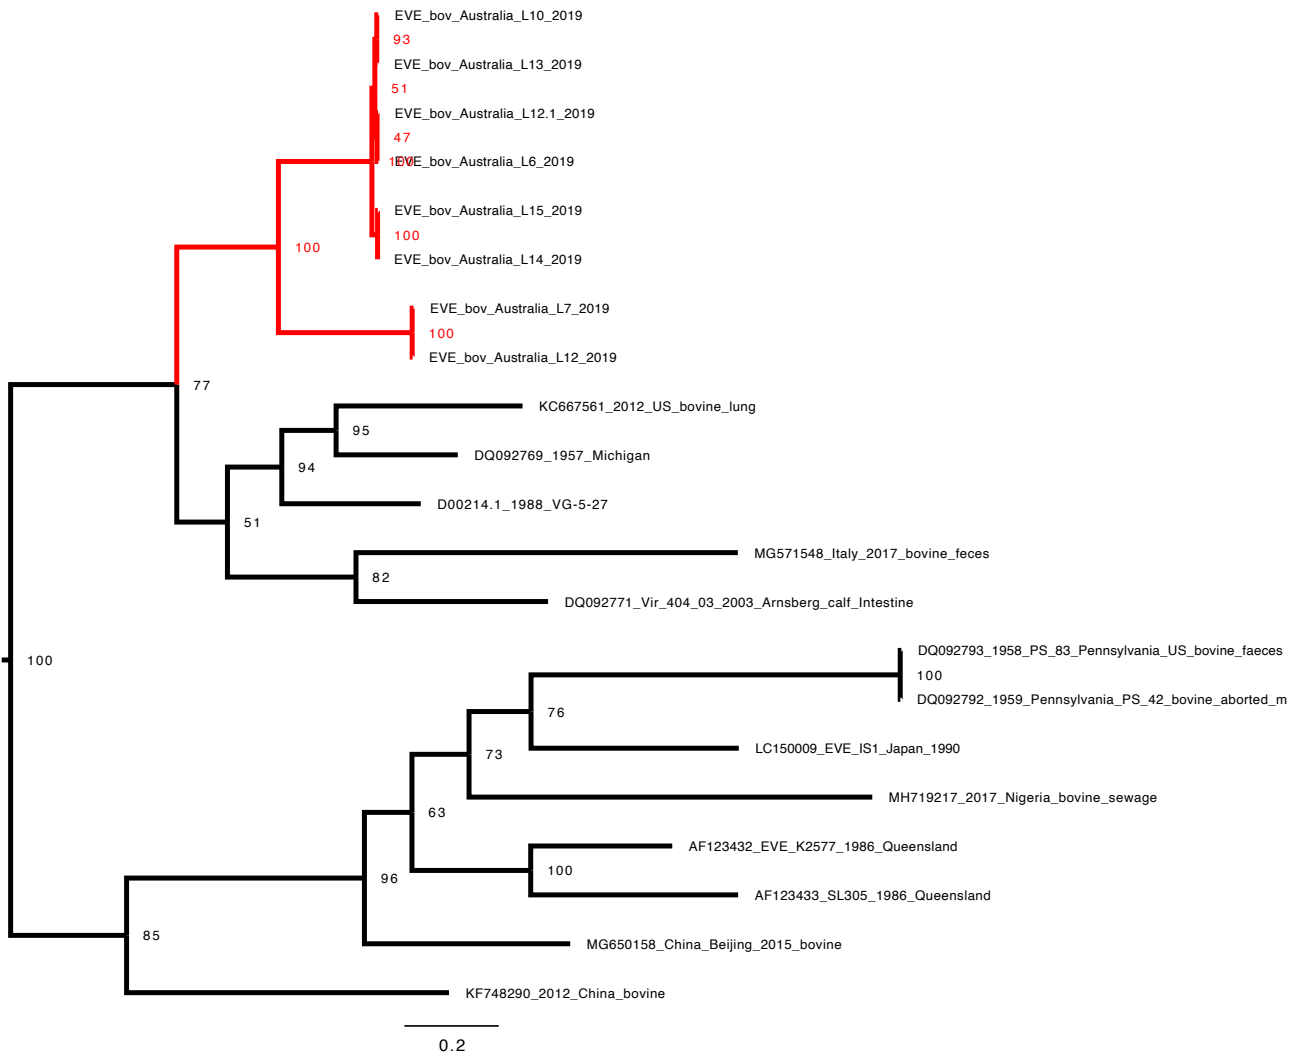

## 6.6 Enterovirus – 3D polymerase

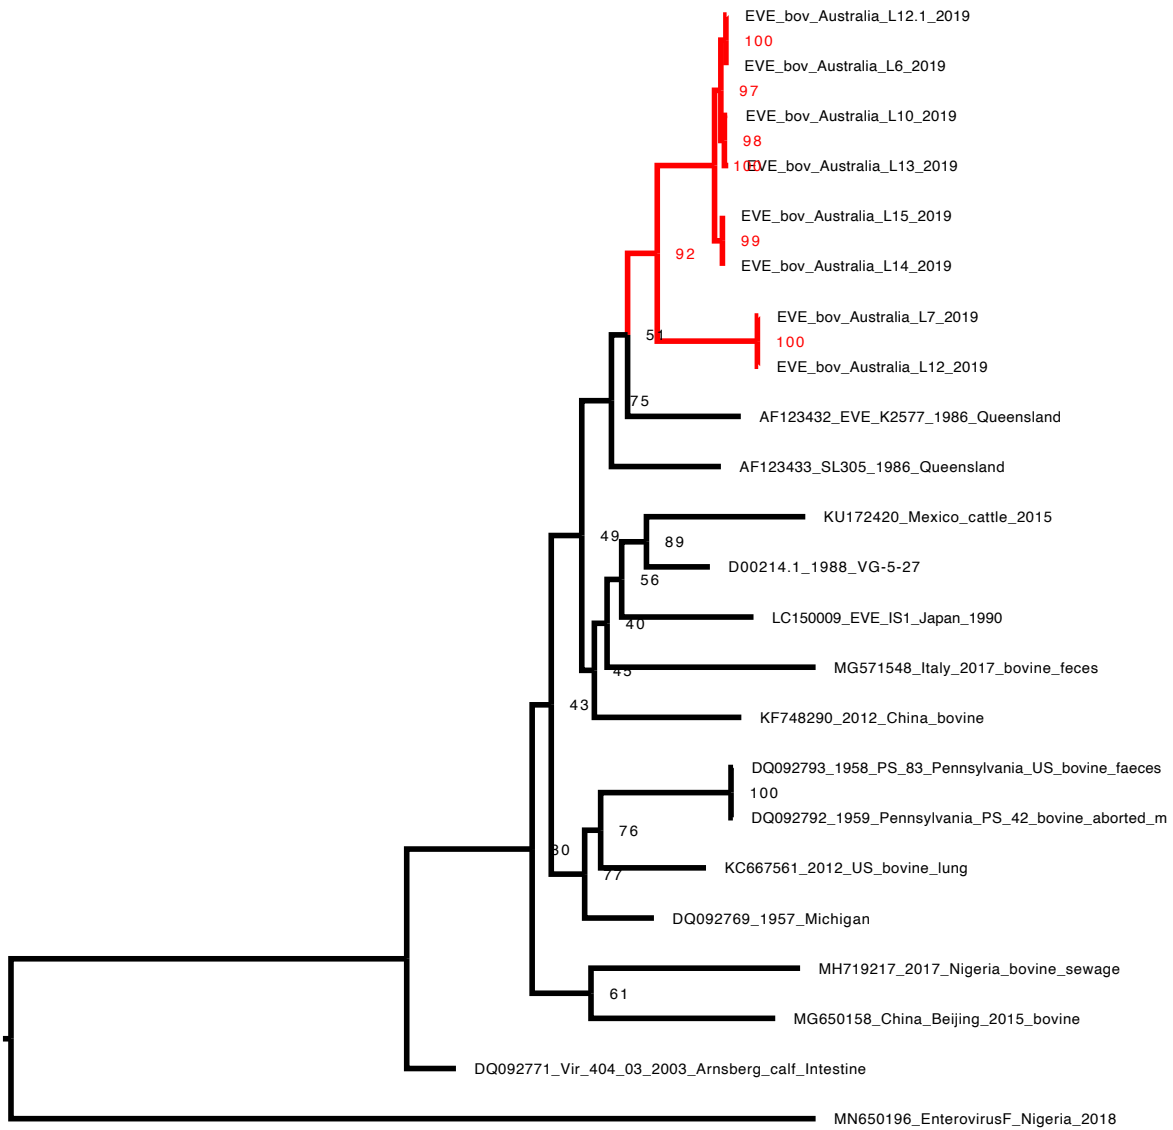

0.2
