# Supplementary material for: Expanding the range of the respiratory infectome in Australian feedlot cattle with and without respiratory disease using metatranscriptomics
Source: PubMed Central journal article supplement (PMC10367309; doi:10.1186/s40168-023-01591-1), 2023-07-25

**Additional file 7. Overview of Bovine narmovirus-1 (Bulang virus) phylogenies**

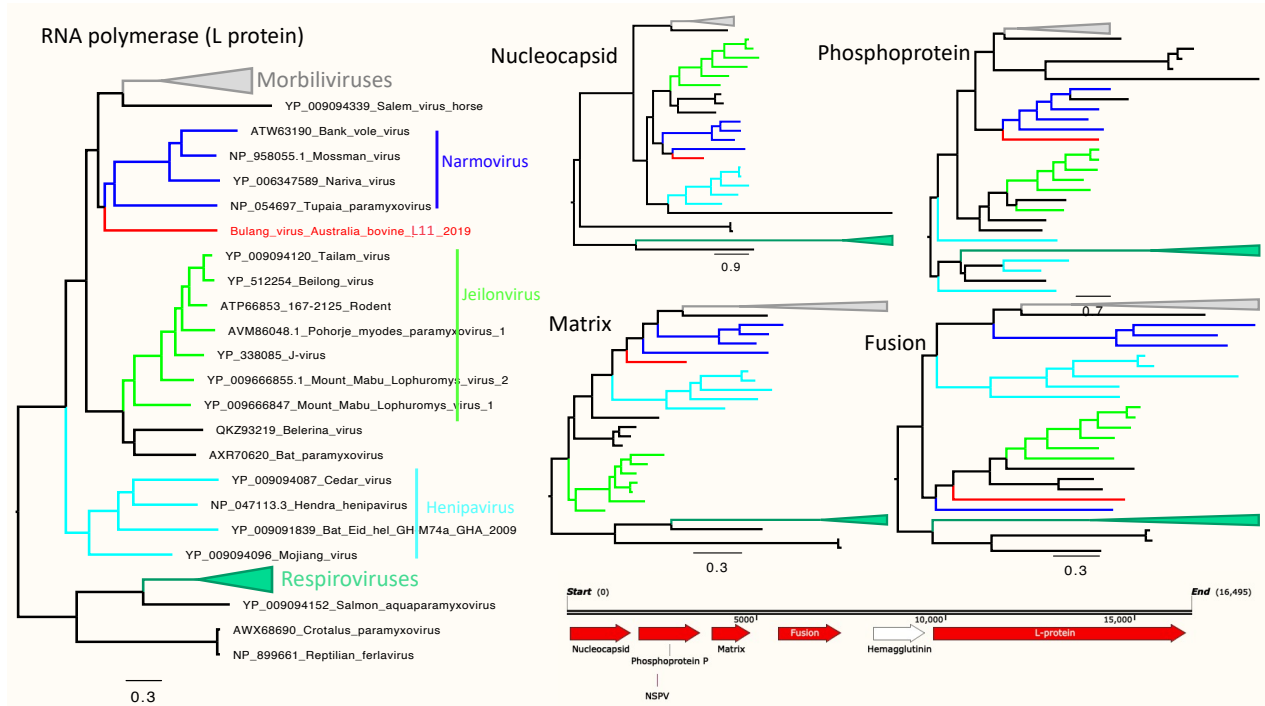

**Fig 7.1.** Maximum likelihood phylogenies of Bovine narmovirus-1 (Bulang virus). All phylogenies were performed with the amino acid sequences. Trees are midpoint rooted. Bovine narmovirus 1 groups within the Narmovirus genus, from small mammals, bats and rodents' hosts. Fusion protein phylogeny shows a different grouping. The genomic organization of the virus is shown at the bottom of the figure, the protein coding segments used to construct the phylogenies are coloured in red.

## 7.2. Bovine narmovirus-1 (Bulang virus)- L protein

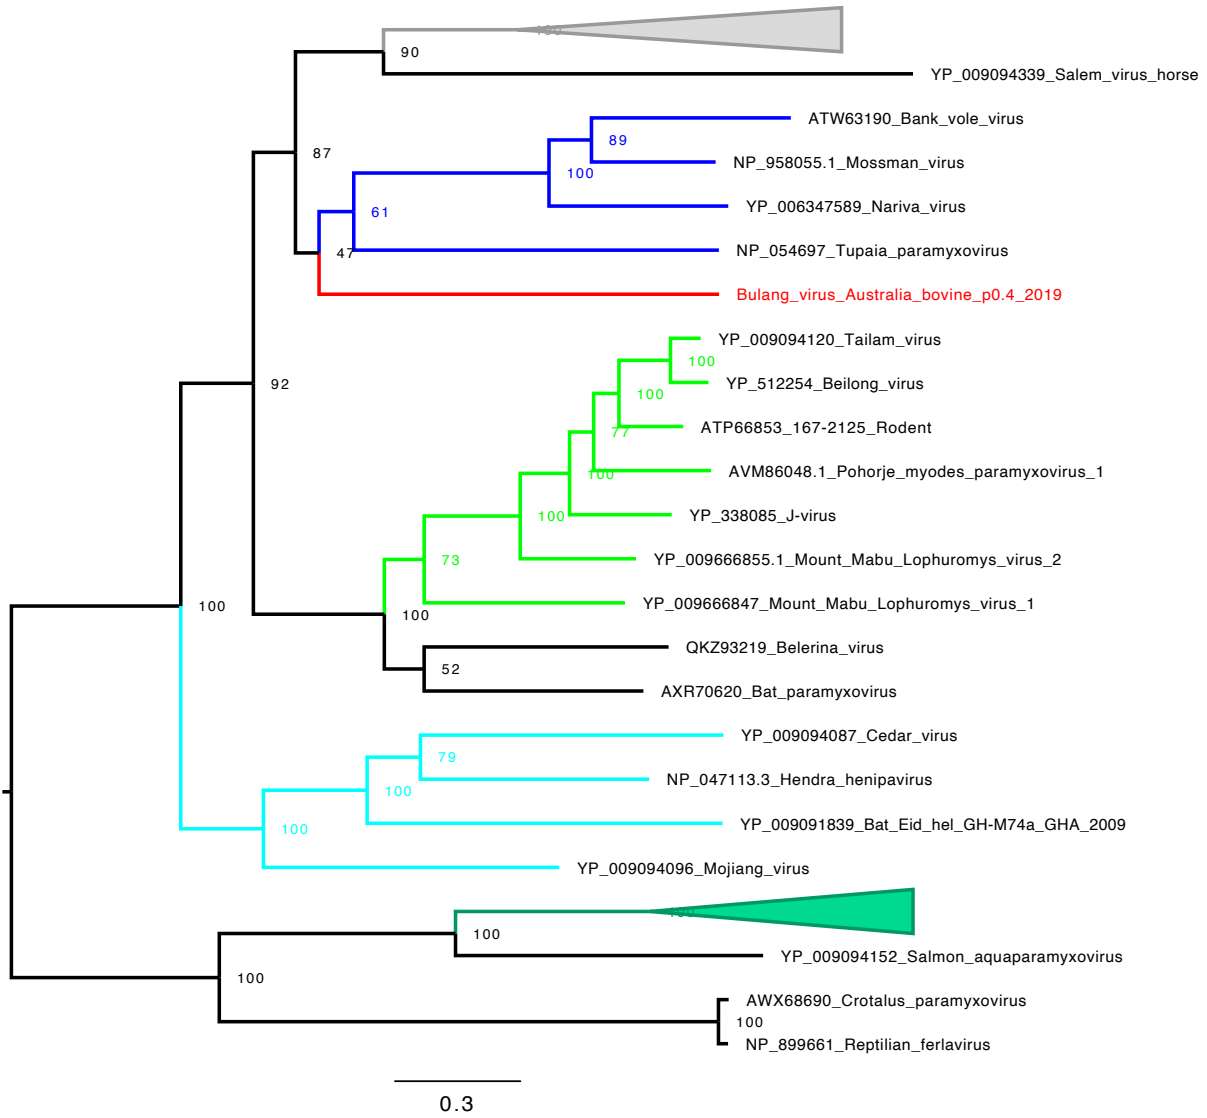

### 7.3. Bovine narmovirus-1 (Bulang virus)– Nucleoprotein

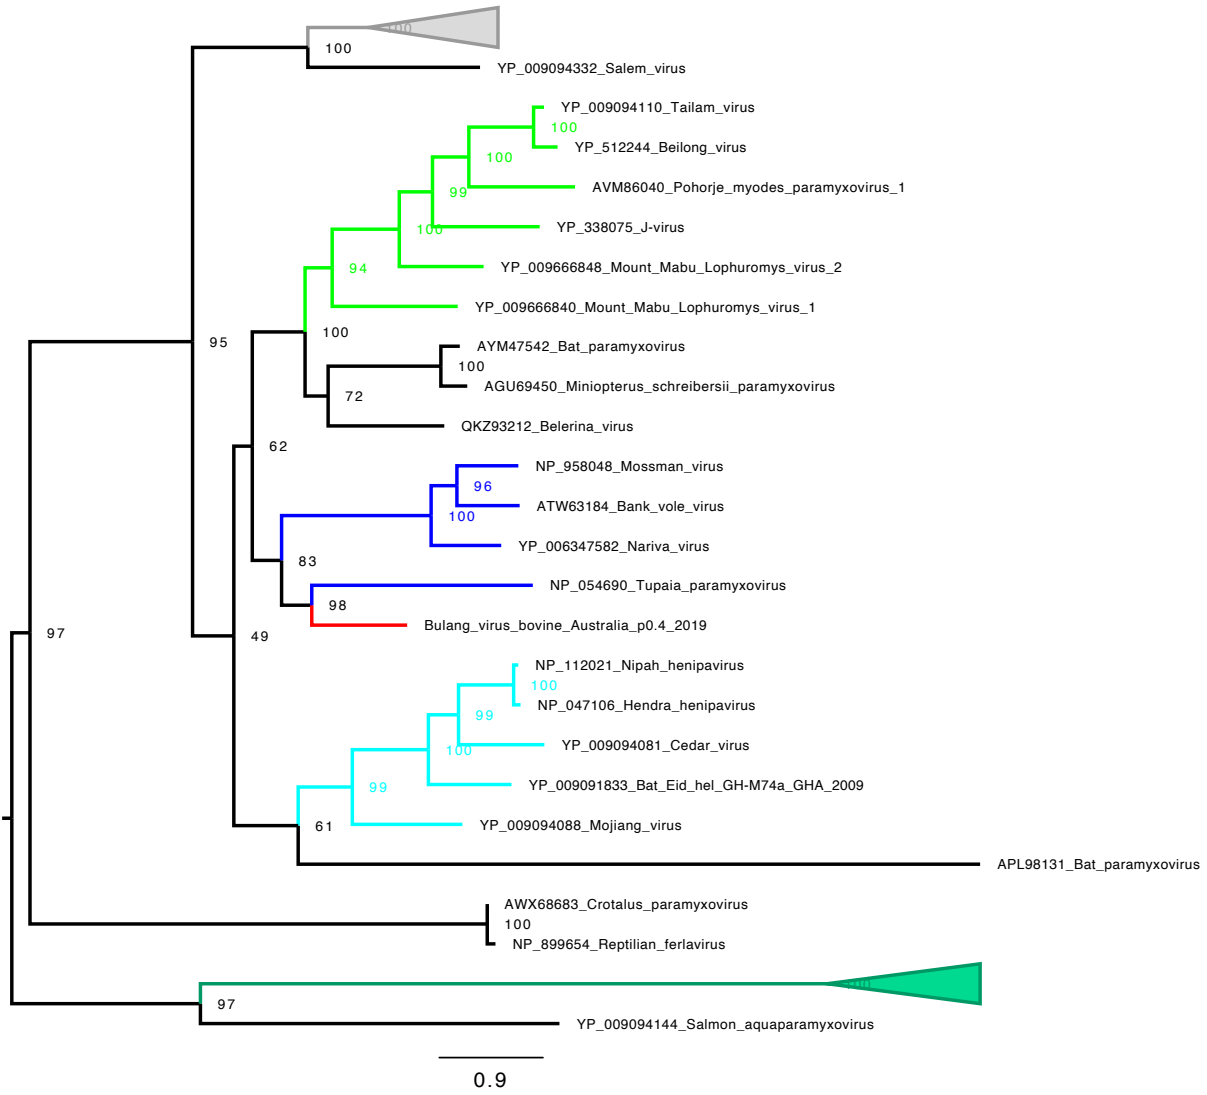

## 7.4. Bovine narmovirus-1 (Bulang virus)– Matrix

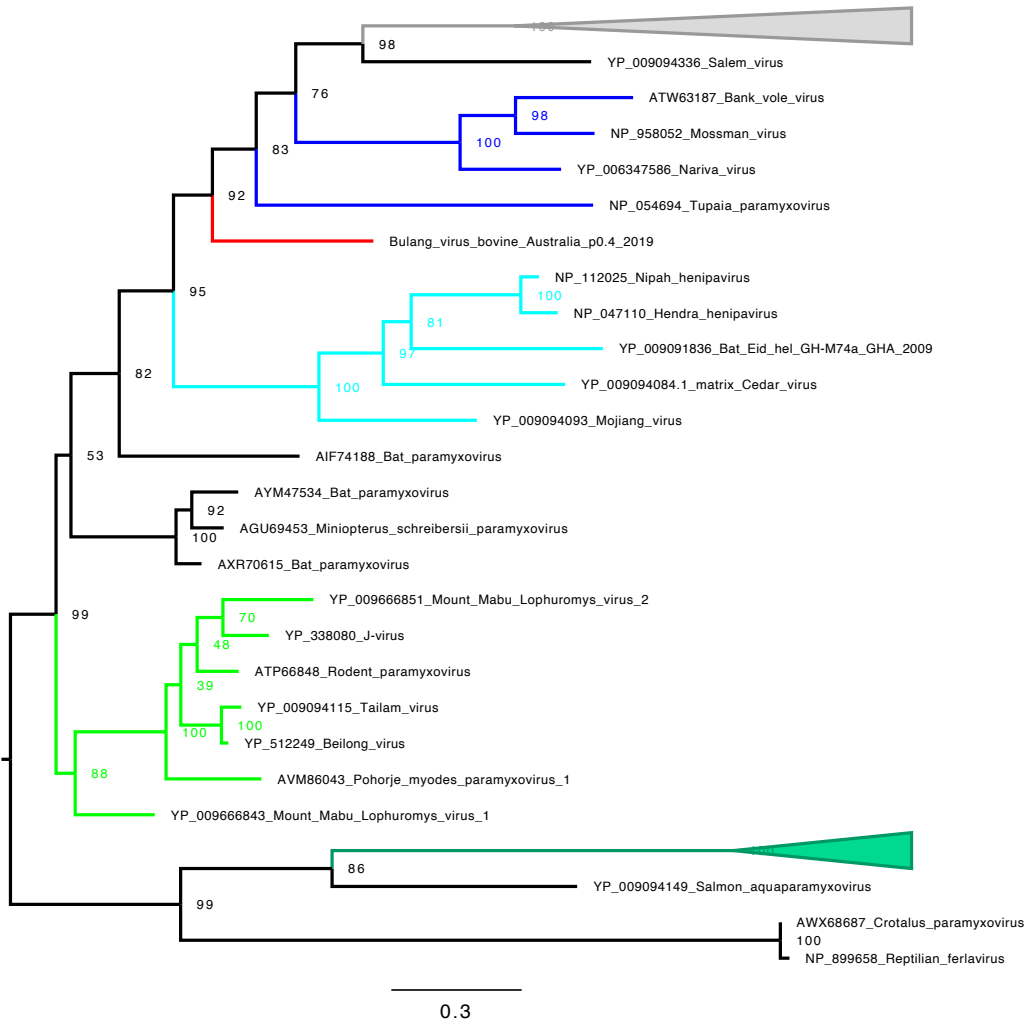

## 7.5. Bovine narmovirus-1 (Bulang virus)– Phosphoprotein

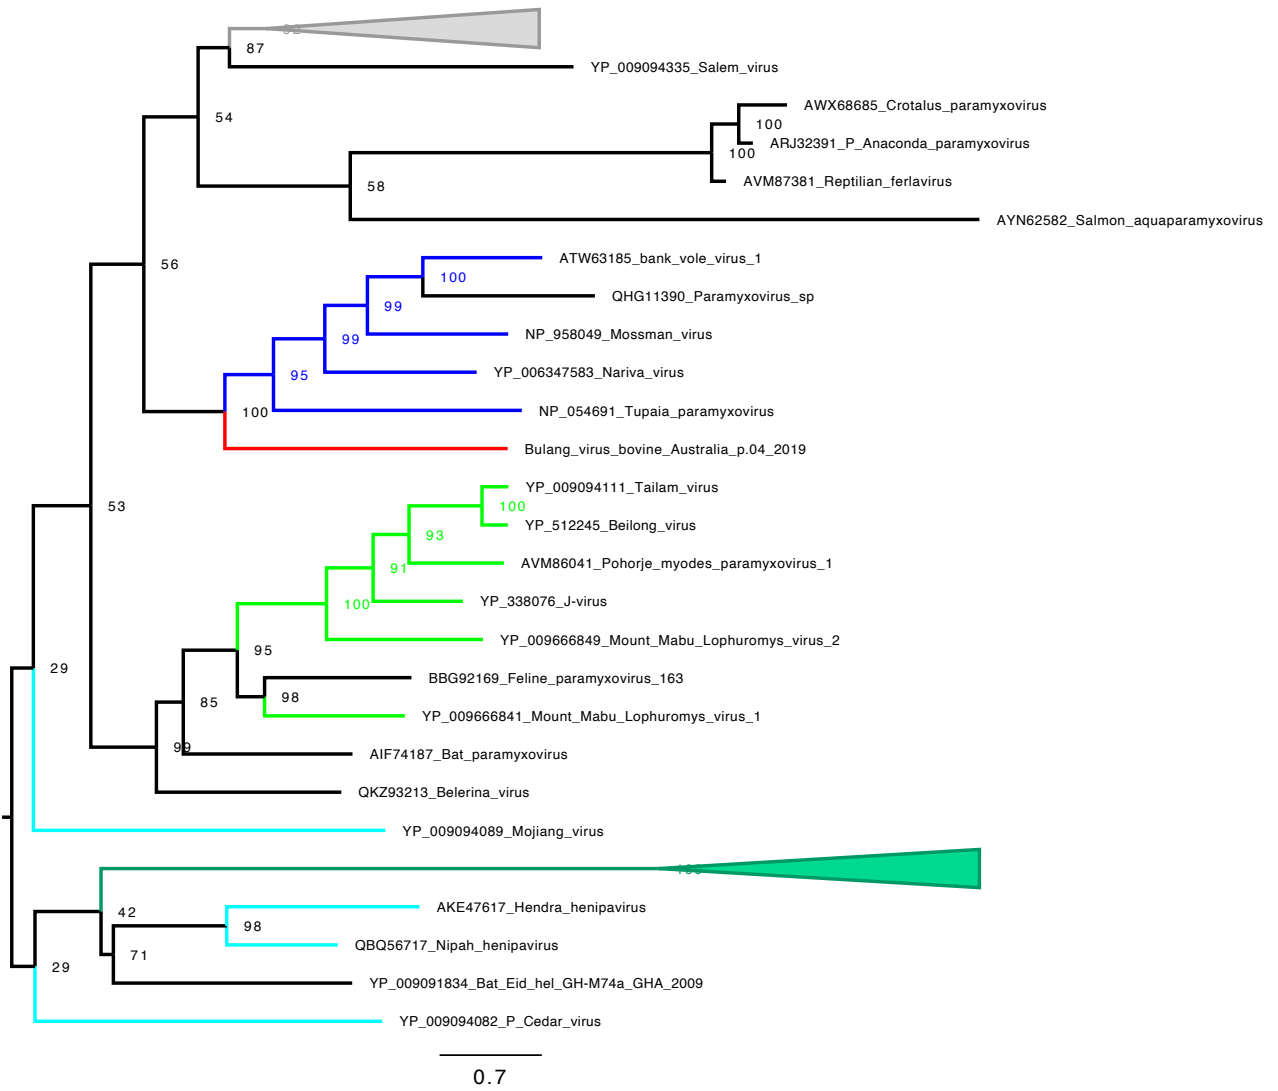

## 7.6. Bovine narmovirus-1 (Bulang virus)– Fusion protein

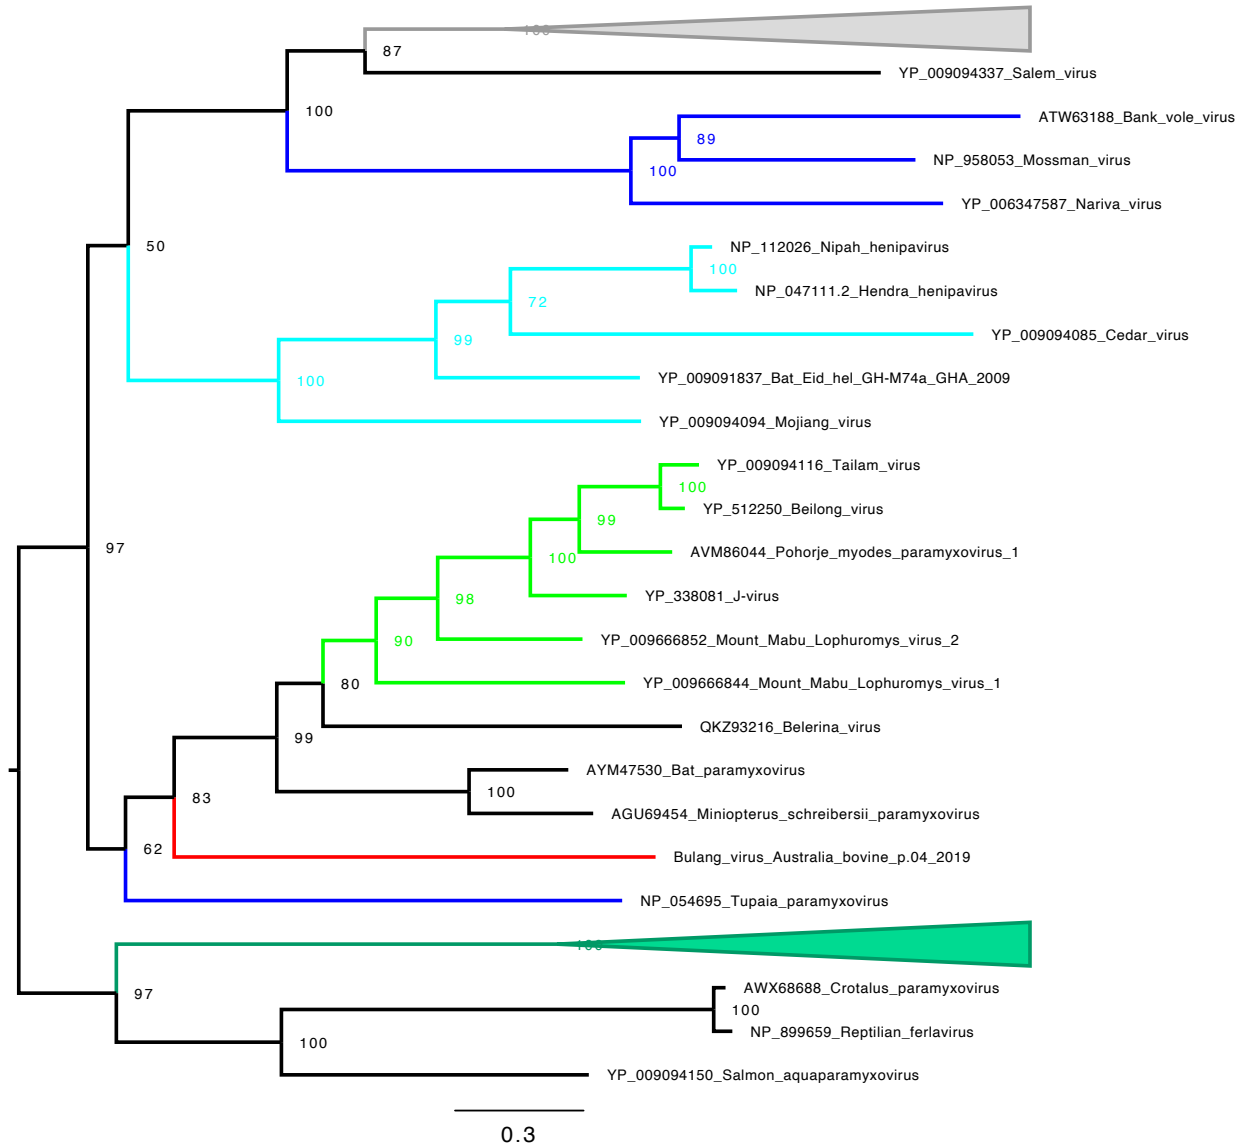

Supplement: 40168_2023_1591_MOESM7_ESM.pdf [file 40168_2023_1591_MOESM7_ESM.pdf]
