# Supplementary material for: Expanding the range of the respiratory infectome in Australian feedlot cattle with and without respiratory disease using metatranscriptomics
Source: PubMed Central journal article supplement (PMC10367309; doi:10.1186/s40168-023-01591-1), 2023-07-25
Supplement: 40168_2023_1591_MOESM8_ESM.pdf [file 40168_2023_1591_MOESM8_ESM.pdf]

Additional file 8

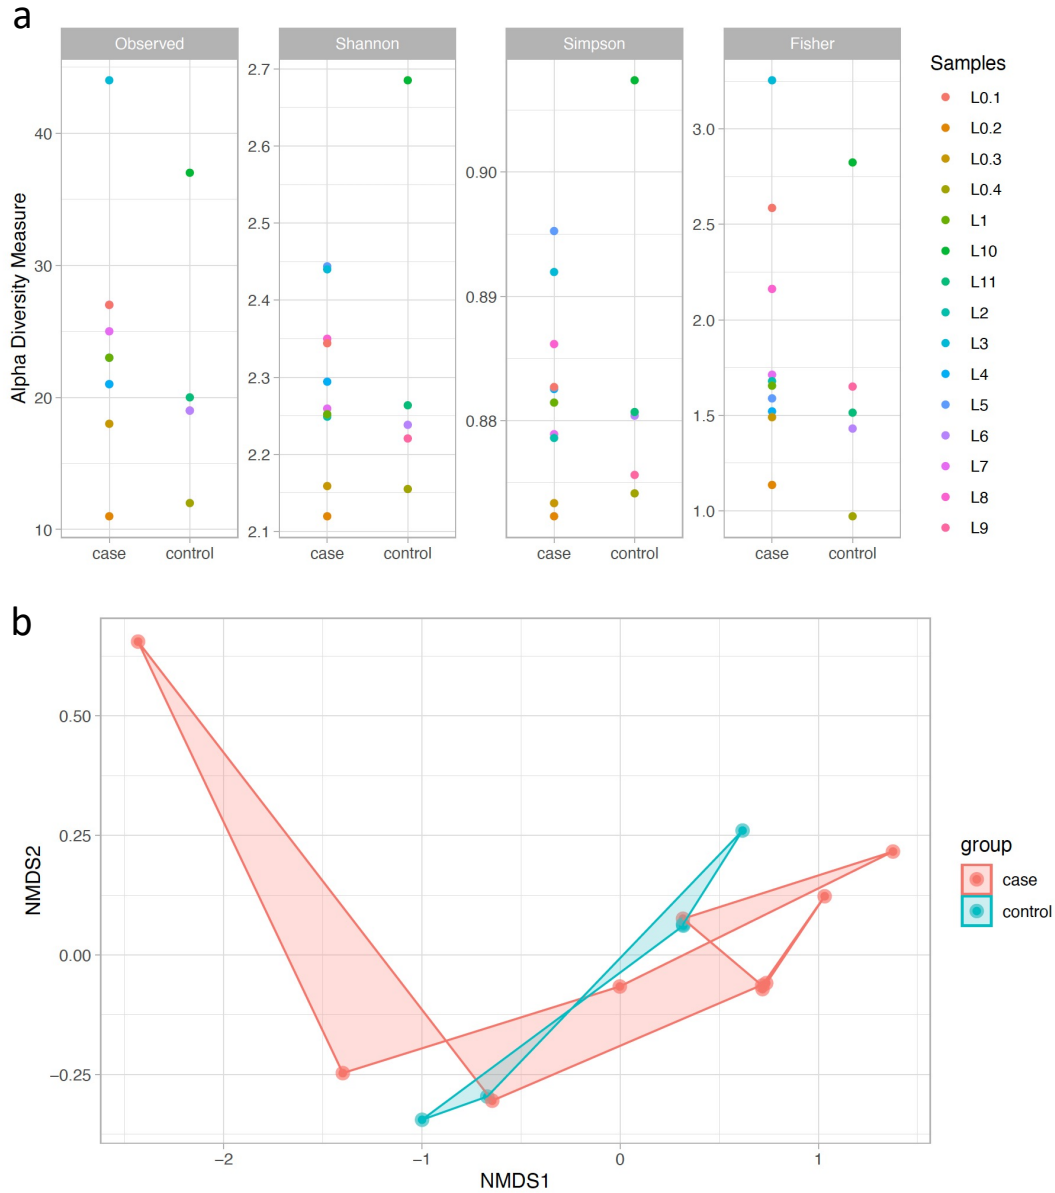

**Fig:** Alpha and beta diversity of the metatranscriptomic sequence libraries obtained from animals with clinical bovine respiratory disease (cases) and without clinical disease (controls). **Fig(a):** The alpha diversity computed using different methods, no significant differences in the alpha diversity were observed between cases and control. **Fig(b).** NMDS plot using Bray-Curtis dissimilarities between samples in cases and controls. There were no significant differences in the beta diversities between cases and controls.
